# Supplementary material
Source: MDPI journal article supplement (https://www.mdpi.com/2073-4344/10/1/26)
Supplement: s1 [file s1]

Supplementary material

# Photocatalysis as a tool for *in vitro* drug metabolism simulation: Multivariate comparison of twelve metal oxides on a set of twenty model drugs

Maciej Gawlik, Jakub Trawiński and Robert Skibiński \*

Department of Medicinal Chemistry, Medical University of Lublin, Jaczewskiego 4, 20-090 Lublin, Poland

\* Correspondence: robert.skibinski@umlub.pl; Tel.: +48 81 4487390; fax: +48 81 4487380.

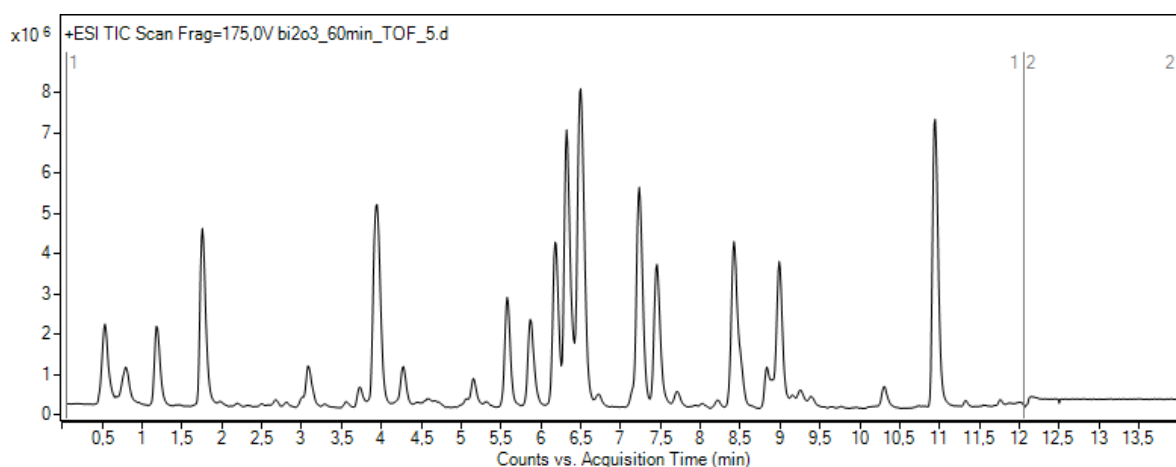

**Figure S1.** Overlay of the total ion current (TIC) from Bi<sub>2</sub>O<sub>3</sub> photocatalytic experiment.

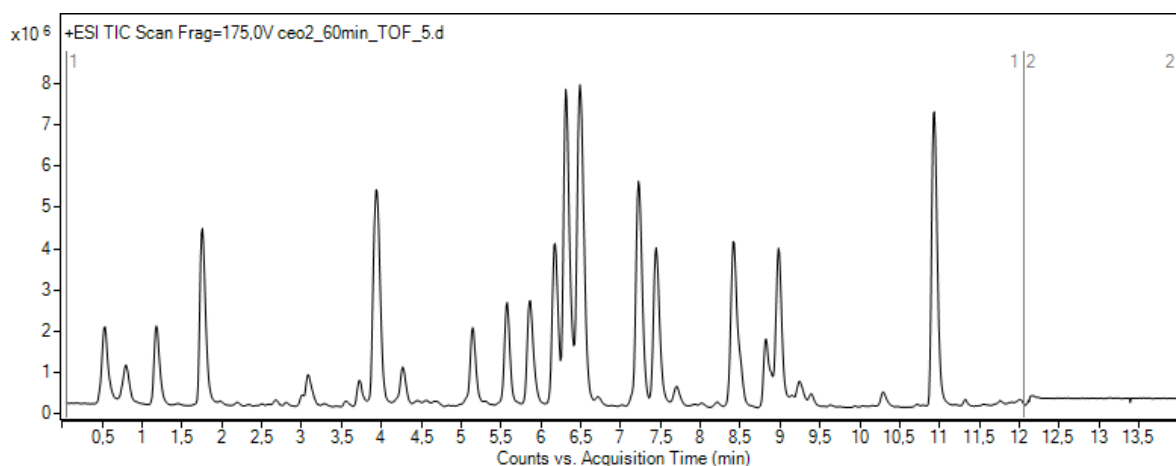

**Figure S2.** Overlay of the total ion current (TIC) from CeO<sub>2</sub> photocatalytic experiment.

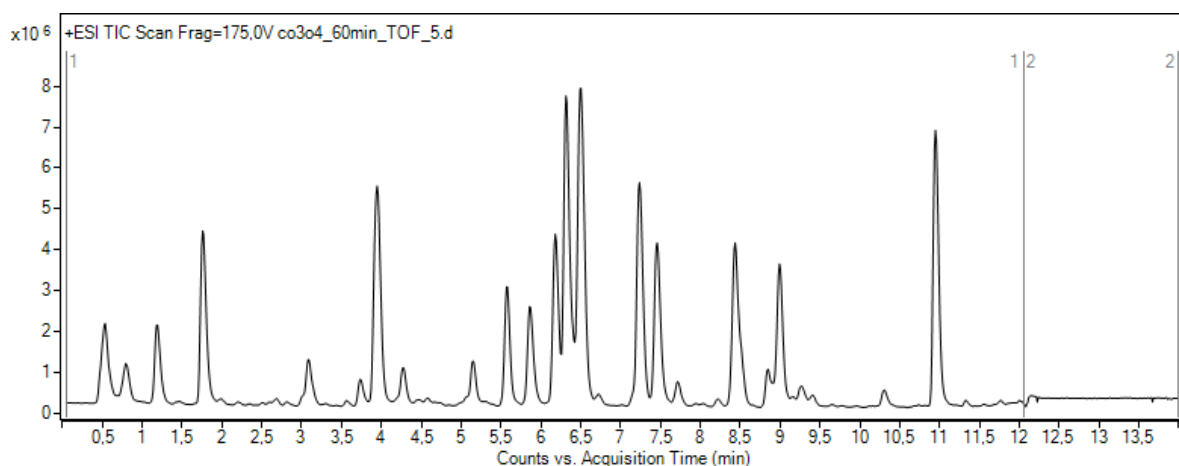

**Figure S3.** Overlay of the total ion current (TIC) from Co<sub>3</sub>O<sub>4</sub> photocatalytic experiment.

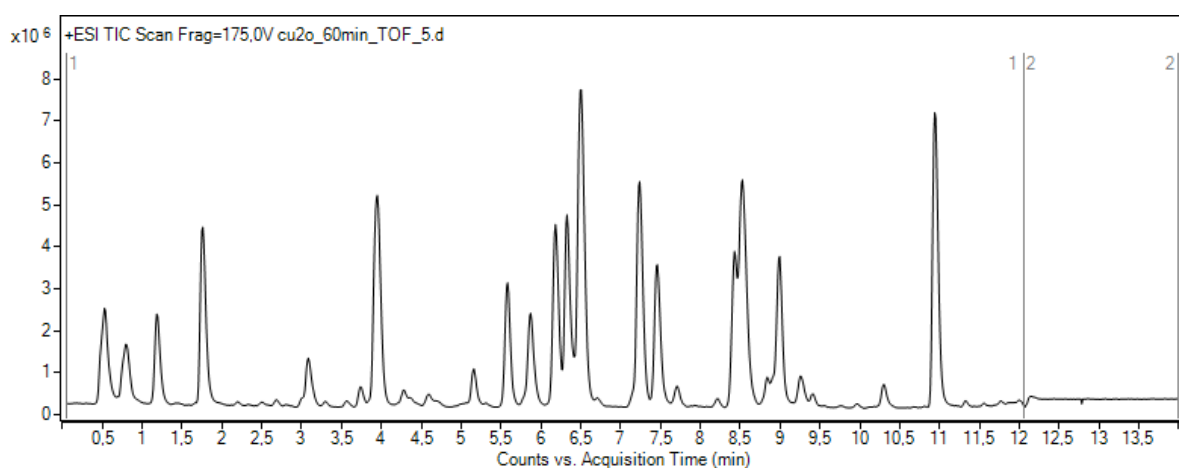

**Figure S4.** Overlay of the total ion current (TIC) from Cu<sub>2</sub>O photocatalytic experiment.

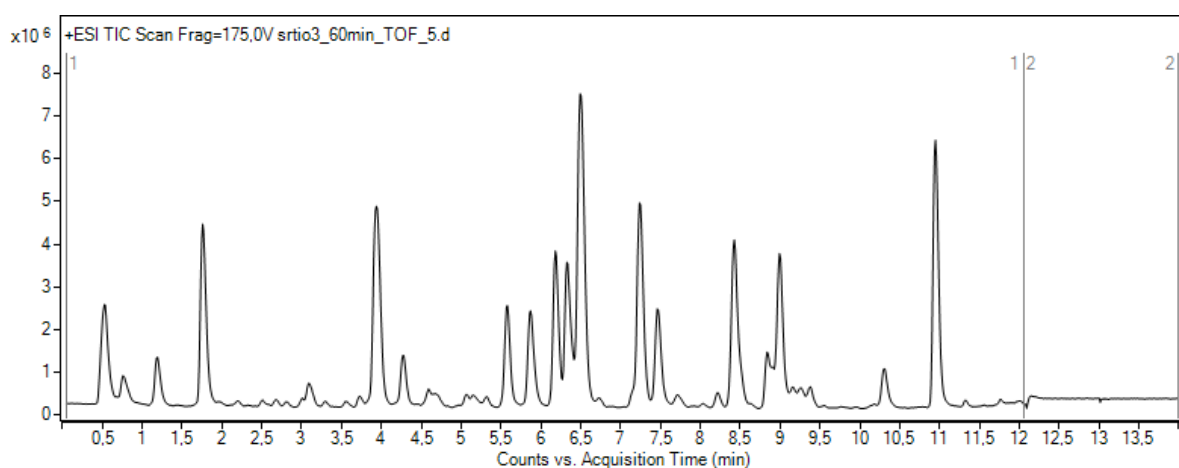

**Figure S5.** Overlay of the total ion current (TIC) from SrTiO<sub>3</sub> photocatalytic experiment.

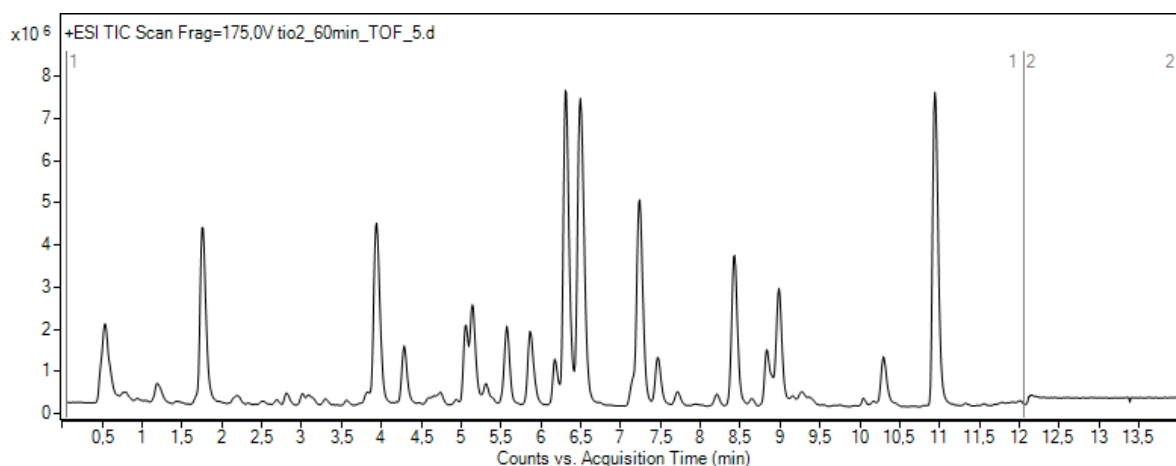

**Figure S6.** Overlay of the total ion current (TIC) from TiO<sub>2</sub> photocatalytic experiment.

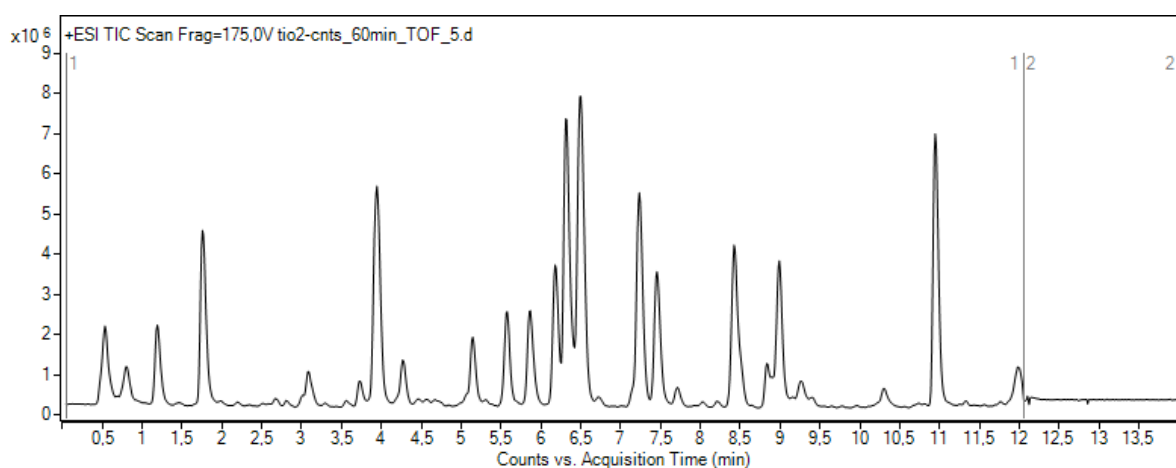

**Figure S7.** Overlay of the total ion current (TIC) from TiO<sub>2</sub> - CNTs photocatalytic experiment.

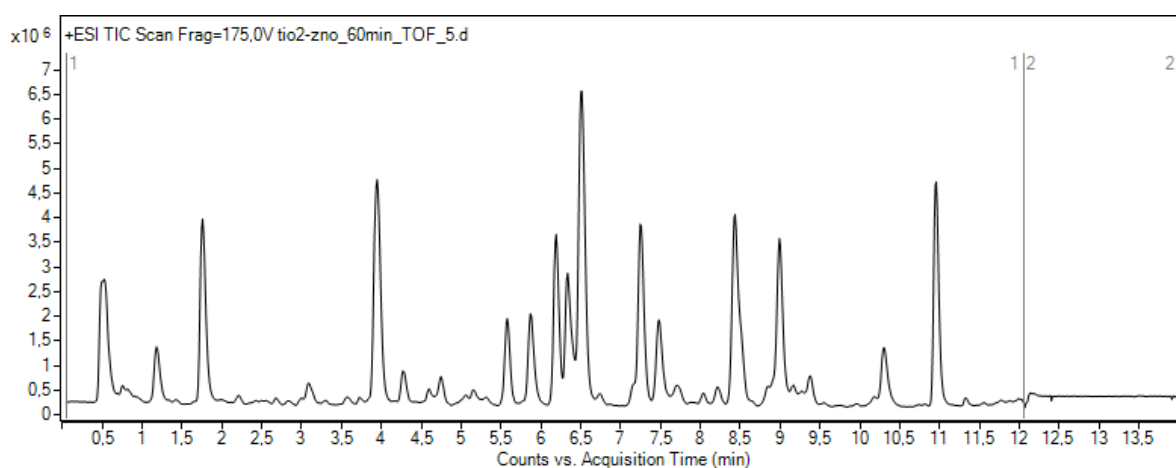

**Figure S8.** Overlay of the total ion current (TIC) from TiO<sub>2</sub> - ZnO photocatalytic experiment.

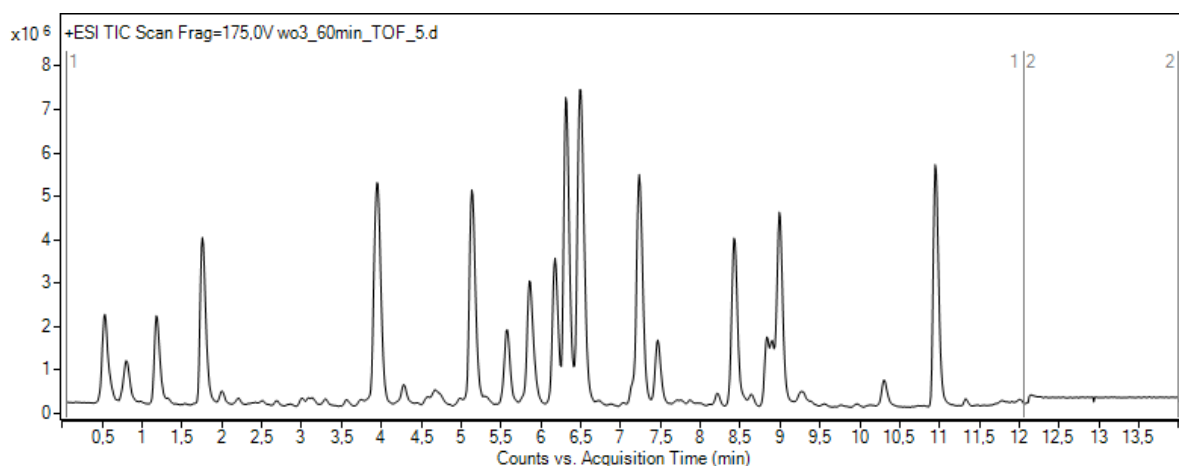

**Figure S9.** Overlay of the total ion current (TIC) from  $\text{WO}_3$  photocatalytic experiment.

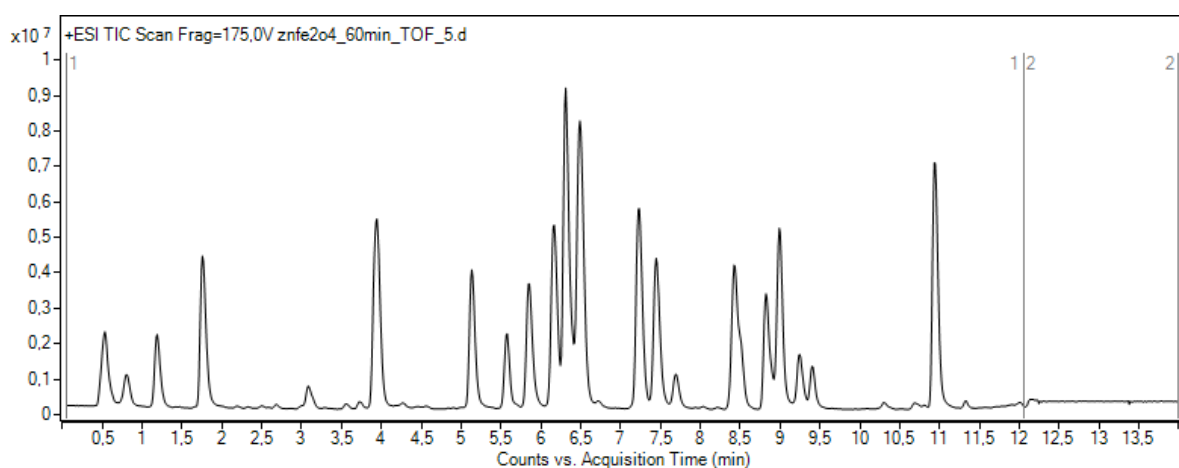

**Figure S10.** Overlay of the total ion current (TIC) from  $\text{ZnFe}_2\text{O}_4$  photocatalytic experiment.

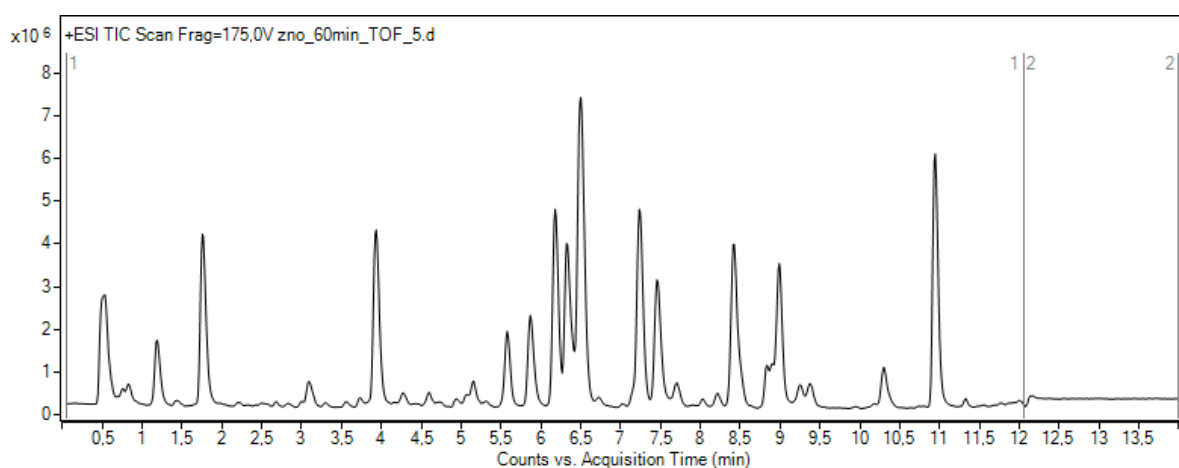

**Figure S11.** Overlay of the total ion current (TIC) from  $\text{ZnO}$  photocatalytic experiment.

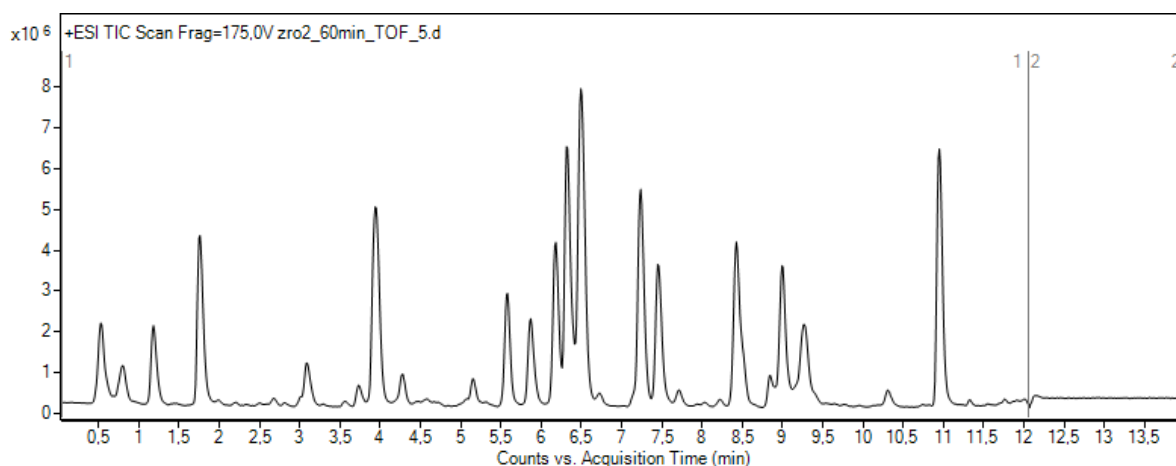

**Figure S12.** Overlay of the total ion current (TIC) from ZrO<sub>2</sub> photocatalytic experiment.

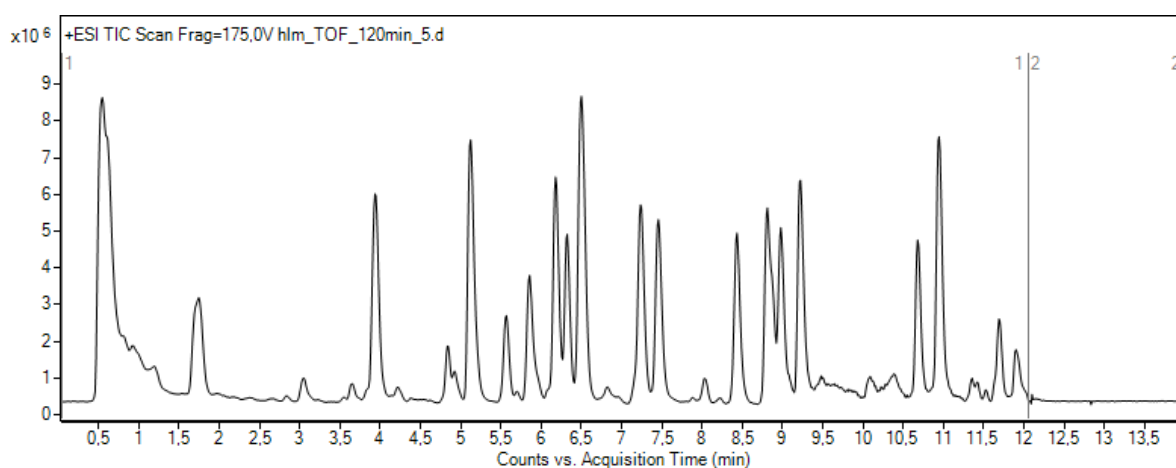

**Figure S13.** Overlay of the total ion current (TIC) from HLM incubation.

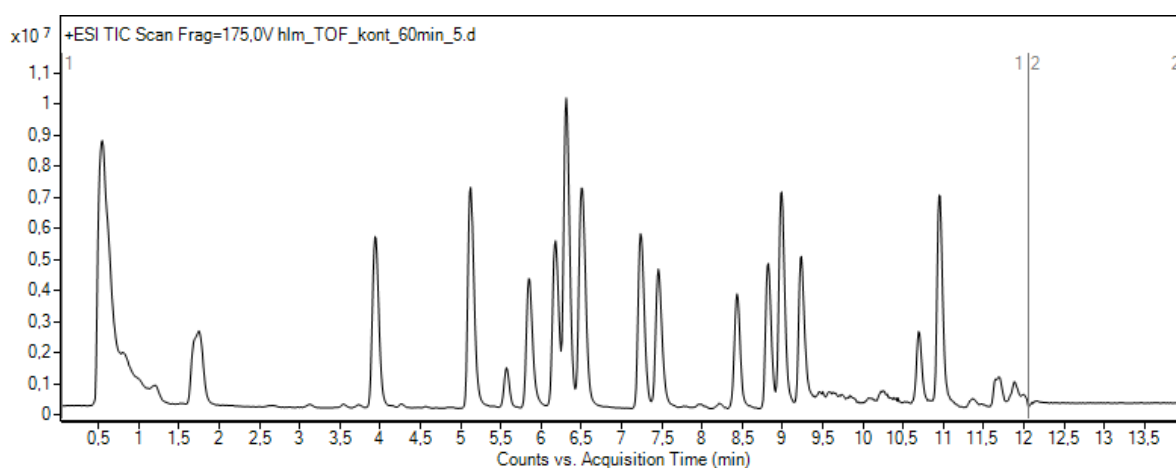

**Figure S14.** Overlay of the total ion current (TIC) from HLM control sample.

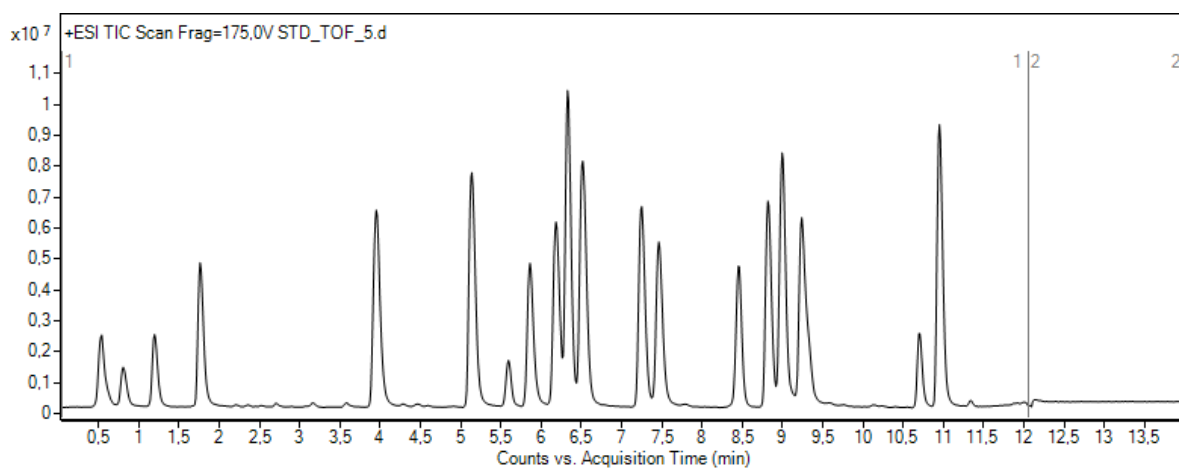

**Figure S15.** Overlay of the total ion current (TIC) from standard sample.

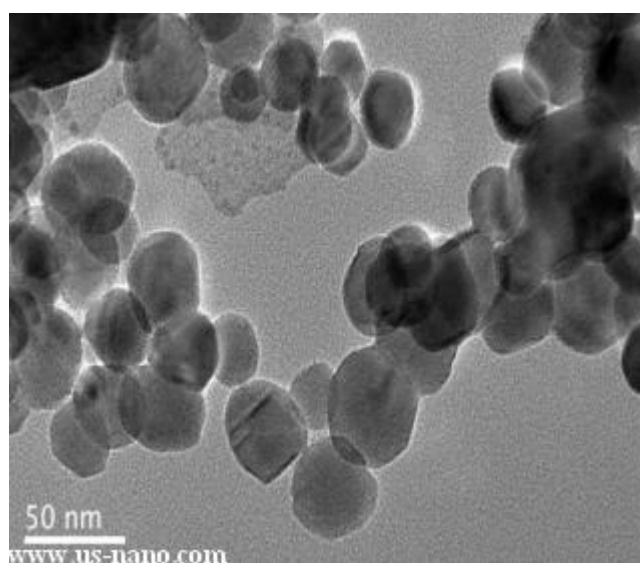

**Figure S16.** TEM image of  $\text{Bi}_2\text{O}_3$ .

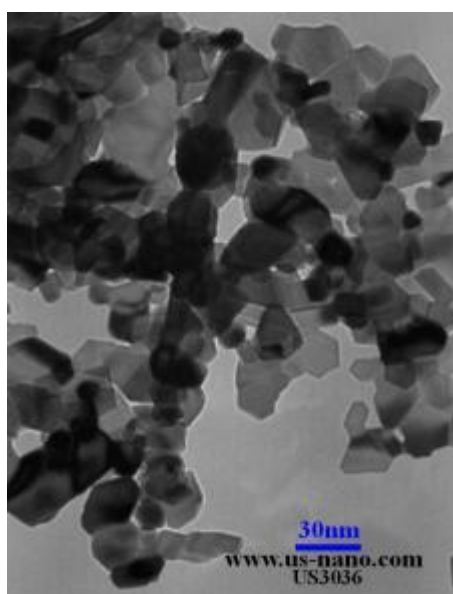

**Figure S17.** TEM image of  $\text{CeO}_2$ .

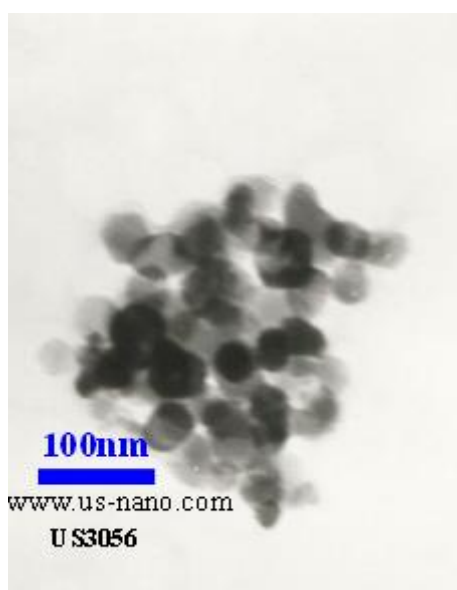

Figure S18. TEM image of  $\text{Co}_3\text{O}_4$ .

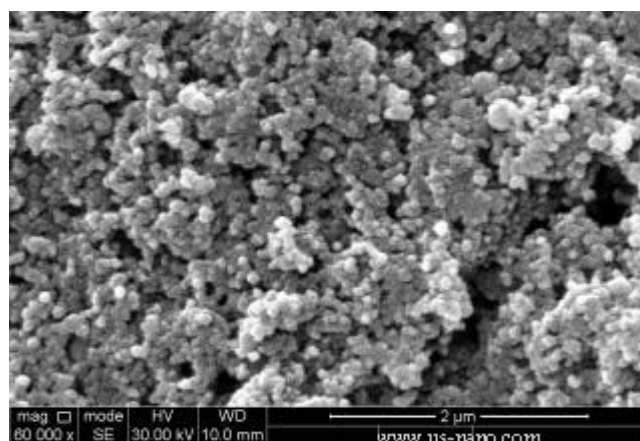

Figure S19. SEM image of  $\text{Cu}_2\text{O}$ .

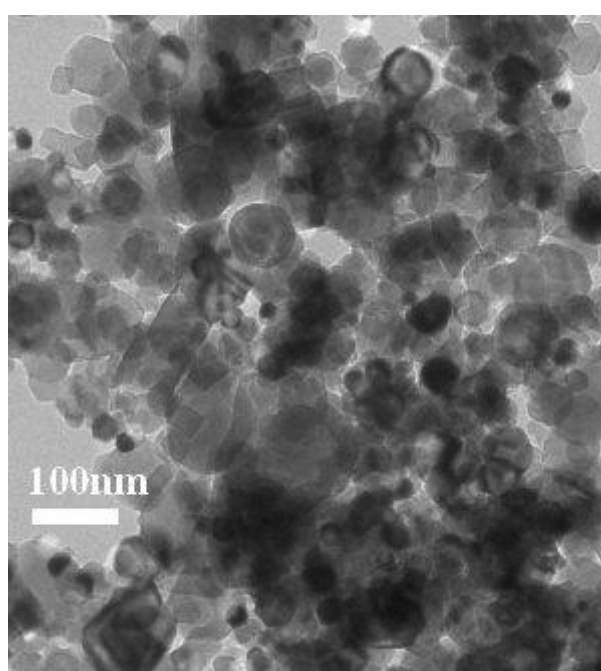

Figure S20. TEM image of  $\text{SrTiO}_3$ .

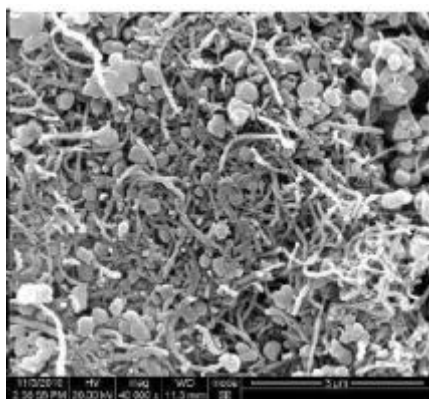

Figure S21. SEM image of TiO<sub>2</sub>-CNTs.

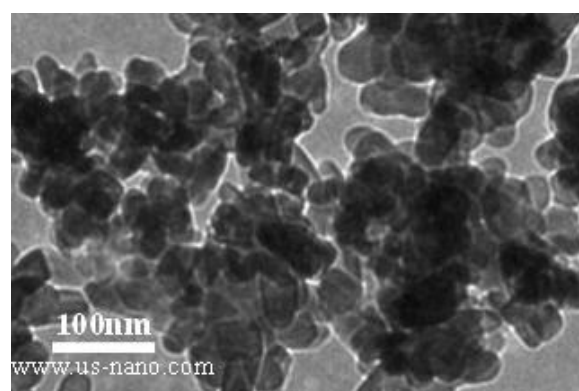

Figure S22. TEM image of TiO<sub>2</sub>-ZnO.

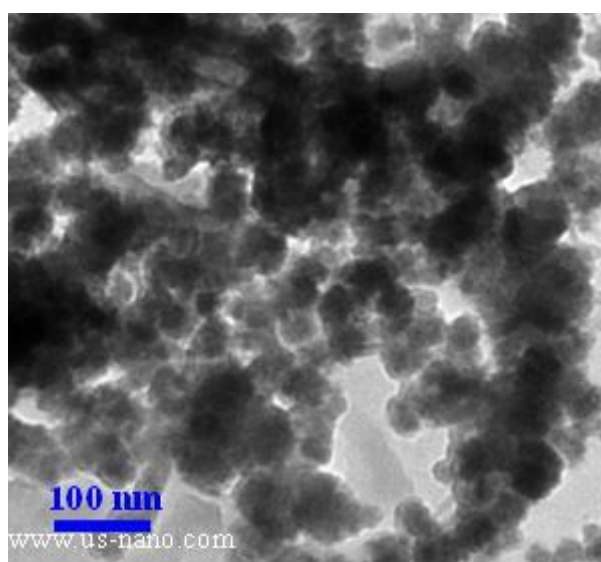

Figure S23. TEM image of ZnFe<sub>2</sub>O<sub>4</sub>.



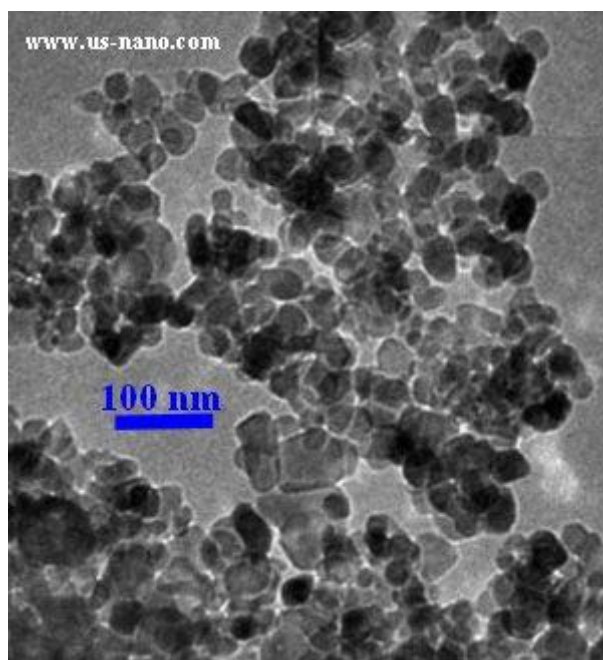

**Figure S24.** TEM image of ZrO<sub>2</sub>.
